# Supplementary material for: The Coordinated Upregulated Expression of Genes Involved in MEP, Chlorophyll, Carotenoid and Tocopherol Pathways, Mirrored the Corresponding Metabolite Contents in Rice Leaves during De-Etiolation
Source: MDPI journal article supplement (doi:10.3390/plants10071456), 2021-07-16
Supplement: s1 [file s1]

## Article

# The Coordinated Upregulated Expression of Genes Involved in MEP, Chlorophyll, Carotenoid and Tocopherol Pathways, Mirrored the Corresponding Metabolite Contents in Rice Leaves during De-Etiolation

Xin Jin <sup>1,2,3,†</sup>, Can Baysal <sup>3,†</sup>, Margit Drapal <sup>4</sup>, Yanmin Sheng <sup>5</sup>, Xin Huang <sup>3</sup>, Wenshu He <sup>3</sup>, Lianxuan Shi <sup>6</sup>, Teresa Capell <sup>3</sup>, Paul D. Fraser <sup>4</sup>, Paul Christou <sup>3,7</sup> and Changfu Zhu <sup>3,5,\*</sup>

<sup>1</sup> Gansu Provincial Key Laboratory of Aridland Crop Science, Gansu Agricultural University, Lanzhou 730070, China

<sup>2</sup> College of Life Science and Technology, Gansu Agricultural University, Lanzhou 730070, China

<sup>3</sup> Department of Plant Production and Forestry Science, University of Lleida-Agrotecnio CERCA Center, Av. Alcalde Rovira Roure, 191, 25198 Lleida, Spain

<sup>4</sup> Biochemistry, Royal Holloway University of London, Egham Hill, Egham, Surrey TW20 0EX, UK

<sup>5</sup> School of Life Sciences, Changchun Normal University, Changchun 130032, China

<sup>6</sup> School of Life Sciences, Northeast Normal University, Changchun 130024, China

<sup>7</sup> ICREA, Catalan Institute for Research and Advanced Studies, Passeig Lluís Companys 23, 08010 Barcelona, Spain

\* Correspondence: changfu.zhu@udl.cat

† These authors contributed equally to this work.

**Citation:** Jin, X.; Baysal, C.; Drapal, M.; Sheng, Y.; Huang, X.; He, W.; Shi, L.; Capell, T.; Fraser, P.D.; Christou, P.; et al. The Coordinated

Upregulated Expression of Genes Involved in MEP, Chlorophyll, Carotenoid and Tocopherol Pathways, Mirrored the

Corresponding Metabolite Contents in Rice Leaves during De-Etiolation.

*Plants* **2021**, *10*, 1456. [https://](https://doi.org/10.3390/plants10071456)

[doi.org/10.3390/plants10071456](https://doi.org/10.3390/plants10071456)

Academic Editor: Fabrizio Araniti

Received: 14 June 2021

Accepted: 8 July 2021

Published: 16 July 2021

**Publisher's Note:** MDPI stays neutral with regard to jurisdictional claims in published maps and institutional affiliations.

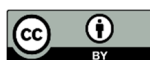

**Copyright:** © 2021 by the authors. Licensee MDPI, Basel, Switzerland. This article is an open access article distributed under the terms and conditions of the Creative Commons Attribution (CC BY) license (<http://creativecommons.org/licenses/by/4.0/>).

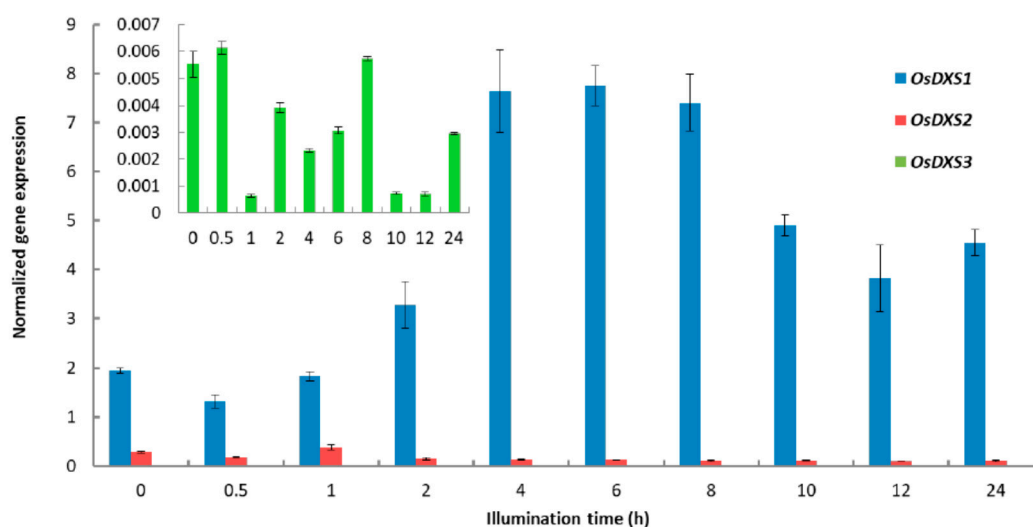

**Figure S1.** Expression of *OsDXS1*, *OsDXS2* and *OsDXS3* in etiolated rice (*Oryza sativa*, EYI105) leaves during de-etiolation at different times after the onset of irradiation with white light, with mRNA levels normalized against *OsActin* mRNA. Three biological replicates and three technical replicates were tested. Bars indicate  $\pm$ SD.

**Table S1.** List of primers used for the qRT-PCR.

| Gene           | Forward primer (5' - 3')   | Reverse primer (5' - 3')   |
|----------------|----------------------------|----------------------------|
| <i>OsActin</i> | GACTCTGGTGATGGTGCAGC       | TCATGTCCCTCACAAATT         |
| <i>OsDXS1</i>  | CTCAAGGGAGGGAAGAACAA       | ACACCTGCTTGTGTCGTTG        |
| <i>OsDXS2</i>  | TGTTGTGGAGCTCGCTATTG       | TCCTCCACCTAGATCCCTT        |
| <i>OsDXS3</i>  | ACCTCCTCGGGAAGAAGAAG       | GAGGGACACCTGCTTGTGTG       |
| <i>OsDXR</i>   | TCCACCCACAATCTATCA         | GGTGACCTCTGAGCAATA         |
| <i>OsMCT</i>   | GACTTGAGGTCACTGATG         | AGCAAGTCATCAGGAGTC         |
| <i>OsCMK</i>   | GTATTTGCAGCATGCGTCGT       | ACCTGGTGCTTTCTACTCACAG     |
| <i>OsMDS</i>   | TCGTCGGTGTTTCATGAGG        | TTGTCTCCTTGAATGGGC         |
| <i>OsHDS</i>   | GGTTGCAATTGTCAATGG         | CTGAATCAAGGCGTCAGT         |
| <i>OsCHLG</i>  | CTGACTTCTTTGTATAGCATAGCTGG | CTGCAACGGATAATTGAGTTATGTCA |
| <i>OsPORA</i>  | CGGCCTCGTCTGAGTTTATTAT     | CCTCTCTCACTGAAAGCTGAAA     |
| <i>OsPORB</i>  | GTGAGTGAGAGTGATGTGCTATT    | CTCCTCCATCGATCTTTCTTGG     |
| <i>OsCAO1</i>  | GGGAGACCTGGATGTGTTATG      | ATGGTAAGGGCATTGGATTCT      |
| <i>OsPSY1</i>  | GAGGCGGGAAGAGGAGATAAA      | GGAAGGCAGATGCTGTCTGATT     |
| <i>OsPSY2</i>  | TTCTTTTGATTTTCGCACGATTTC   | TGGCAGGCTTATGGCATACA       |
| <i>OsPDS</i>   | GATCCAAACCGTTCAATGCTGG     | TGTAACCTCCGTCACACCCATT     |
| <i>OsZDS</i>   | GCTGCCCTTTTTCGCTTGA        | CACAATAACGAAGAACAC ACCATTG |
| <i>OsLYCB</i>  | CGTCCAGTACGACAAGCCGTA      | AAGGGCATGGCGTAGAGGAACG     |
| <i>OsLYCE</i>  | GTATGGCAGGGTTCACAGGGAC     | GCCAGCGTCATAGCATCGTCTC     |
| <i>OsBCH2</i>  | TCGAGAACGTGCCCTACTTCC      | ACCCACCTCCTCCAACCTCCTT     |
| <i>OsHGGT</i>  | ATGGGGATTCTTGAGGCTTTATC    | GGCTGGGCTTATTGACCTTATC     |

|                |                          |                          |
|----------------|--------------------------|--------------------------|
| <i>OsGGR</i>   | GCACCCGAGGCCTAAGAGGG     | GAAGTAGATCCCCTCGCCGGAG   |
| <i>OsVTE1</i>  | ATAACTTTTGGGGAAGTAGGCATG | AAACTCGACTAGAAAATTCCTGAG |
| <i>OsVTE2</i>  | TCACTGGTTTGCTGGAGGCAG    | AAGAGTTGGCTTGTTAACCTTATC |
| <i>OsVTE4</i>  | GTCACGTCTCTTGAGGATATAAG  | TCTTATCGTCTTCCACCCACTTC  |
| <i>OsVTE5</i>  | GCGGGGTCTTCGAGCAGAAAC    | GCATAGCTTCCTGACCTGAAAAG  |
| <i>OsHMGS1</i> | TTGTTGCCTCCTGGGACGTT     | GATCTCCTCGTCGGCCTTCC     |
| <i>OsHMGS2</i> | GCCTACGCCTTCCTCCCAAT     | ATGCCACGTCCTTCCTCTC      |
| <i>OsHMGS3</i> | GGGATGGACGCTACGGTCTT     | TAGCAGCAGCACCTGCTT       |
| <i>OsHMGR1</i> | TGGGCTTGACATACTGCTGA     | AACCTGACCTGCTGCTATCC     |
| <i>OsHMGR2</i> | ACCCAAGAGCTTCACATGCT     | TCCGGAGTTAGCGACTTTGT     |
| <i>OsHMGR3</i> | TCCTGTGAAATGGGTGGCTTT    | ACCGGTTTCATGACTCAGCA     |
| <i>OsMK</i>    | CACTAGTGGATCGCGACCGT     | TGGCCTGCACAATGCAAAC      |
| <i>OsPMK</i>   | ACTTGGGTCATCAGCTGCCA     | GATCTCGTCCAGCTGCGTTG     |
| <i>OsMVD</i>   | CCGTCAACGACAGCATCAGC     | ATCTCCTTGCCGTTGAGCCA     |

Abbreviations: *OsDXS1/2/3*, rice (*Oryza sativa*) 1-deoxy-D-xylulose-5-phosphate synthase 1/2/3 genes; *OsDXR*, rice 1-deoxy-D-xylulose 5-phosphate reductoisomerase gene; *OsMCT*, rice MEP cytidyltransferase gene; *OsCMK*, rice CDP-ME kinase gene; *OsMDS*, rice 2-C-methyl-D-erythritol 2,4-cyclodiphosphate (ME-2,4cPP) synthase gene; *OsHDS*, rice 1-hydroxy-2-methyl-2-butenyl 4-diphosphate (HMBPP) synthase gene; *OsCHLG*, rice chlorophyll synthase gene; *OsPORA*, rice protochlorophyllide oxidoreductase A gene; *OsPORB*, rice protochlorophyllide oxidoreductase B gene; *OsCAO1*, chlorophyllide *a* oxygenase 1 gene; *OsPSY1/2*, rice phytoene synthase 1/2 genes; *OsPDS*, rice phytoene desaturase gene; *OsZDS*, rice  $\zeta$ -carotene desaturase gene; *OsLYCB*, rice lycopene  $\beta$ -cyclase gene; *OsLYCE*, rice lycopene  $\epsilon$ -cyclase gene; *OsBCH2*, rice  $\beta$ -carotene hydroxylase gene; *OsHGGT*, rice homogentisate geranylgeranyltransferase gene; *OsVTE1*, rice tocopherol cyclase gene; *OsVTE2*, rice homogentisate phytyltransferase gene; *OsVTE4*, rice  $\gamma$ -tocopherol methyltransferase gene; *OsVTE5*, rice phytol kinase gene; *OsHMGS1/2/3*, rice HMG synthase 1/2/3 genes; *OsHMGR1/2/3*, rice 3-hydroxy-3-methylglutaryl-CoA reductase 1/2/3 genes; *OsMK*, rice MVA kinase gene; *OsPMK*, rice phospho-MVA kinase gene; *OsMVD*, rice MVA diphosphate decarboxylase gene.

**Table S2.** Primers used for rice *DXS* cDNA cloning in this study.

| Gene          | Forward primer (5' - 3')                                 | Reverse primer (5' - 3')                                |
|---------------|----------------------------------------------------------|---------------------------------------------------------|
| <i>OsDXS1</i> | <u>GAATTC</u> ATGCGCTCACGACGTTCTCC<br>ATTTCGAGAGGAGG     | <u>GGATCC</u> TACGCGTTGGGCACCGTCATGA<br>TGGCGAGCGCCT    |
| <i>OsDXS2</i> | <u>GAATTC</u> CATGGGTGGGAGATATCTGCAT<br>TCTCCACCTGCTGTTA | <u>AAGCTT</u> CCTTCTTACTTCATCAACAAAA<br>GTGCGTCTCGGTGTC |
| <i>OsDXS3</i> | <u>GAATTC</u> CATGGGTGGGAGATATCTGCAT<br>TCTCCACCTGCTGTTA | <u>GGATCC</u> TACGCTGAGCTGAAGTGCCTCC<br>AATGGCCTCCCAAG  |

EcoRI (GAATTC), BamHI (GGATCC) and HindIII (AAGCTT) restriction sites are underlined. Abbreviations: *OsDXS1/2/3*, rice (*Oryza sativa*) 1-deoxy-D-xylulose-5-phosphate synthase 1/2/3 genes
